# Supplementary material for: Impact of a Mediterranean Dietary Pattern and Its Components on Cardiovascular Risk Factors, Glucose Control, and Body Weight in People with Type 2 Diabetes: A Real-Life Study
Source: PubMed Central journal article supplement (PMC6115857; doi:10.3390/nu10081067), 2018-08-10
Supplement: nutrients-10-01067-s001.pdf [file nutrients-10-01067-s001.pdf]

**Complete list of collaborators, members of the TOSCA.IT Study Group (surname is reported in bold)**

Olga Vaccaro, Maria Masulli, Antonio Nicolucci, Aldo Pietro Maggioni, Paolo Mocarelli, Giuseppe Lucisano, Michele Sacco, Stefano Signorini, Fabrizio Cappellini, Gabriele Riccardi, Massimo Boemi†, Federica D'Angelo, Roberto Giansanti, Laura Tanase, Luigi Lanari, Ivano Testa, Lucia Ricci, Francesca Pancani, Anna Ranchelli, Paolo Vagheggi, Alessia Scatona, Lucia Fontana, Francesco Giorgino, Luigi Laviola, Lucia Tarantino, Claudia Ippolito, Vittoria Gigantelli, Mariangela Manicone, Eleonora Conte, Roberto Trevisan, Cristiana Scaranna, Rossella Rota, Anna Corsi, Alessandro R. Dodesini, Giulio Marchesini Reggiani, Luca Montesi, Natalia Mazzella, Gabriele Forlani, Chiara Caselli, Raffaella Di Luzio, Arianna Mazzotti, Antimo Aiello, Angelina Barrea, Fiorentina D'Amico, Sebastiano Squatrito, Tiziana Sinagra, Sara Longhitano, Vanessa Tropea, Maria Sparti, Salvatore Italia, Enrico Lisi, Giuseppe Grasso, Federica Insalaco, Agostino Gnasso, Claudio Carallo, Caterina Scicchitano, Maria Serena De Franceschi, Costanza Santini, Giovanni Calbucci, Raffaella Ripani, Laura Corsi, Giacomo Cuneo, Simona Corsi, Carlo B. Giorda, Francesco Romeo, Annalisa Lesina, Marco Comoglio, Caterina Bonetto, Anna Robusto, Elisa Nada, Vincenzo Asprino, Rosa Cetraro, Michelina Impieri, Giuseppe Lucchese, Giovanna Donnarumma, Biagio Tizio, Gennaro Clemente, Lazzaro Lenza, Pia Paraggio, Franco Tomasi, Chiara Zamboni, Nicoletta Dozio, Egle Scalambra, Edoardo Mannucci, Caterina Lamanna, Mauro Cignarelli†, Olga La Macchia, Stefania Fariello, Maria Rosaria Sorrentino, Ivano Franzetti, Raffaella Radin, Renzo Cordera, Francesca Annunziata, Laura Affinito Bonabello, Arianna Durante, Mara Dolcino, Fiorenza Gallo, Chiara Mazzucchelli, Anna Aleo, Pierluigi Melga, Lucia Briatore, Davide Maggi, Daniela Storace, Francesca Cecoli, Daniela Antenucci, Ercole D'Ugo, Mario Pupillo, Maria Pompea Antonia Baldassarre, Anita Minnucci, Angelo De Luca, Antonella Zugaro, Livia Santarelli, Angela Bosco, Vittorio Petrella, Grazia Giovanna La Verghetta, Rossella Iannarelli, Antonella De Gregorio, Settimio D'Andrea, Anna Elisa Giuliani, Lorella Polidoro, Alessandra Sperandio, Filomena Sciarretta, Alfonso Pezzella, Raffaella Buzzetti, Angela Carlone, Stella Potenziani, Chiara Venditti, Chiara Foffi, Salvatore Carbone, Laura Cipolloni, Chiara Moretti, Gaetano Leto, Rosalia Serra, Francesca Petrachi, Isabella Romano, Graziano Di Cianni, Emilia Lacaria, Laura Russo, Chiara Goretti, Claudia Sannino, Giovanna Gregori, Maria Dolci, Laura Bruselli, Mary L. Mori, Fabio Baccetti, Maria Del Freo, Antonino Di Benedetto, Domenico Cucinotta, Loretta Giunta, Maria Concetta Ruffo, Desiree Cannizzaro, Basilio Pintaudi, Giovanni Perrone, Pietro Pata, Francesco Ragonese, Gabriele Lettina, Teresa Mancuso, Aldo Coppolino, Pier Marco Piatti, Lucilla Monti, Michela Stuccillo, Pietro Lucotti, Manuela Setola, Giulia Valentina Crippa, Cinzia Loi, Matteo Oldani, Maria Luisa Bottalico, Beatrice Pellegata, Matteo Bonomo, Laura Silvia Maria Menicatti, Veronica Resi, Federico Bertuzzi, Eugenia Olga Disoteo, Gianluigi Pizzi, Angela Albarosa Rivellese, Giovanni Annuzzi, Brunella Capaldo, Rossella Nappo, Stefania Michela Auciello, Anna Amelia Turco, Lucia Costagliola, Ciro Iovine, Giuseppina Della Corte, Pasquale Vallefuoco, Francesca Nappi, Marilena Vitale, Sara Coccozza, Ornella Ciano, Elena Massimino; Nadia Garofalo; Angelo Avogaro, Monica Vedovato, Gabriella Guarneri, Annunziata Lapolla, Domenico Fedele, Giovanni Sartore, Nino Cristiano Chilelli, Silvia Burlina, Barbara Bonsembiante, Carla Giordano, Aldo Galluzzo†, Vittoria Torregrossa, Elisabetta Dall'Aglio, Giovanni Mancastroppa, Leone Arsenio, Federico Cioni, Silvana Caronna, Matteo Papi, Massimiliano Babini, Gabriele Perriello, Fausto Santeusano, Gioia Calagreti, Alessia Timi, Alice Tantucci, Cecilia Marino, Agostino Consoli, Federica Ginestra, Rosamaria Di Biagio, Merilda Taraborelli, Stefano Del Prato, Roberto Miccoli, Cristina Bianchi, Monia Garofolo, Konstantina Savina Politi, Giuseppe Penno, Donatella Zavaroni, Stefania Livraga, Fabio Calzoni, Giovanni Luigi Francesco Mancastroppa, Roberto Anichini, Elisa Corsini, Anna Tedeschi, Maria Sole Gaglianò, Giulio Ippolito, Elisabetta Salutini, Giuseppe

**Citro, Maria Natale, Vita Salvatore, Armando Zampino, Rosa Sinisi, Maria Calabrese, Adolfo Arcangeli, Alessia Zogheri, Sandra Guizzotti, Rossella Longo, Paolo Di Bartolo, Francesca Pellicano, Patrizia Scolozzi, Simona Termine, Alessandra Luberto, Giorgio Ballardini, Anna Carla Babini, Cristina Trojani, Paolo Mazzuca, Matteo Bruglia, Monica Ciamei, Silvia Genghini, Chiara Zannoni, Giuseppe Pugliese, Martina Vitale, Graziela Rangel, Laura Salvi, Alessandra Zappaterreno, Samantha Cordone, Paola Simonelli, Marilla Meggiorini, Aurora Frasheri, Clelia Di Pippo, Cristina Maglio, Giulia Mazzitelli, Davide Lauro, Maria Elena Rinaldi, Angelica Galli, Maria Romano, Paola D'Angelo, Sergio Leotta†, Concetta Suraci, Salvatore De Cosmo, Simonetta Bacci, Antonio Pio Palena, Monica Mancino, Maurizio Rondinelli, Filippo Capone, Elisabetta Calabretto, Monica Bulgheroni, Loredana Bucciarelli, Francesco Dotta, Elena Ceccarelli, Cecilia Fondelli, Clorinda Santacroce, Elisa Guarino, Laura Nigi, Carlo Lalli, Maura Scarponi, Valeria Montani, Paolo Di Bernardino, Paola Romagni, Katia Dolcetti, Emanuela Cannarsa, Elisa Forte, Lucilla Tamburo, Paolo Fornengo, Paolo Cavallo Perin, Tania Prinzi, Chiara Zucco, Massimo Perotta, Simona Monsignore, Francesco Panero, Fulvia Ponzi, Antonio Carlo Bossi, Rita Carpinteri, Maria Linda Casagrande, Maria Francesca Coletti, Annalisa Balini, Marcello Filopanti, Sara Madaschi, Anna Pulcina, Franco Grimaldi, Laura Tonutti, Giorgio Venturini, Sandra Agus, Stefania Pagnutti, Francesca Guidotti, Alessandro Cavarape, Enzo Bonora, Massimo Cigolini, Isabella Pichiri, Corinna Brangani, Giulia Fainelli, Elena Tomasetto, Giacomo Zoppini, Anna Galletti, Dominica Perrone, Claudio Capra, Francesca Bianchini, Martina Ceseri, Barbara Di Nardo, Elisa Sasso, Barbara Bartolomei, Irina Suliman, Gianna Fabbri**
